# Supplementary material
Source: publisher figshare collection journal article supplement (https://frontiersin.figshare.com/ndownloader/files/10594282)
Supplement: Supplementary file [file 10594282]

## Supplementary Materials for

# **RovM and CsrA Negatively Regulate Urease Expression in *Yersinia pseudotuberculosis***

Qingyun Dai<sup>1#</sup>, Lei Xu<sup>2, 3#</sup>, Lu Xiao<sup>1</sup>, Kaixiang Zhu<sup>1</sup>, Yunhong Song<sup>2</sup>, Changfu Li<sup>1</sup>,  
Lingfang Zhu<sup>2</sup>, Xihui Shen<sup>2, 3\*</sup>, and Yao Wang<sup>1\*</sup>

<sup>1</sup> State Key Laboratory of Crop Stress Biology for Arid Areas and College of Life Sciences, Northwest A&F University, Yangling, Shaanxi 712100, China.

<sup>2</sup> College of Life Sciences, Northwest A&F University, Yangling, Shaanxi 712100, China.

<sup>3</sup> Shaanxi Key Laboratory of Agricultural and Environmental Microbiology, College of Life Sciences, Northwest A & F University, Yangling, Shaanxi 712100, China

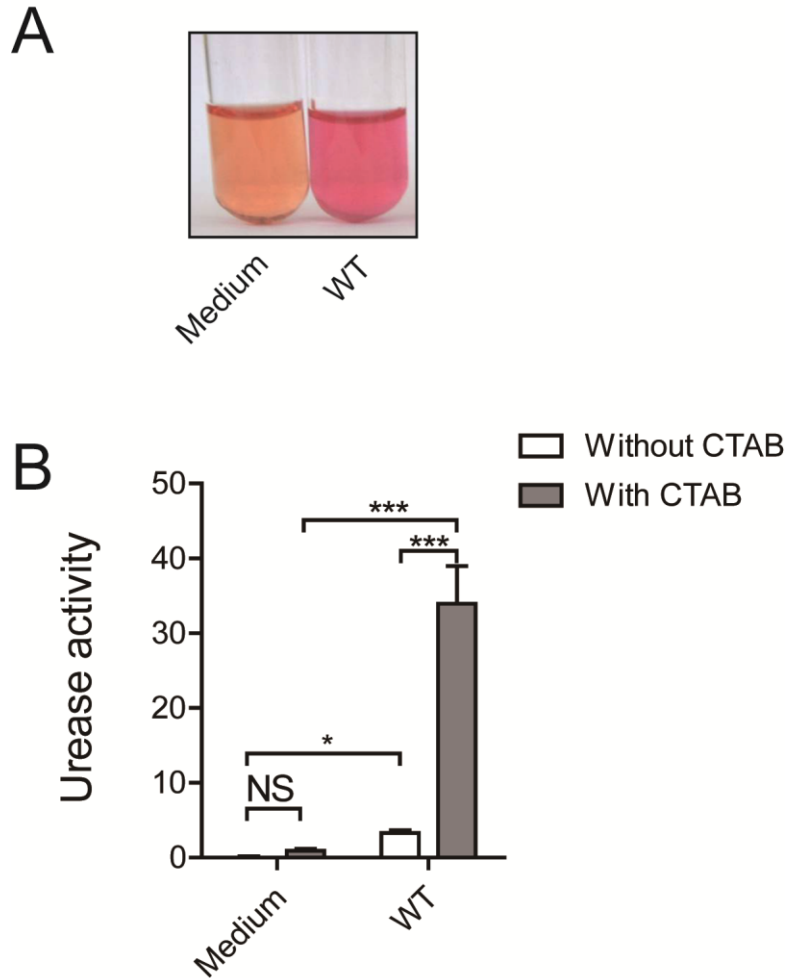

**Figure S1. Qualitative and quantitative assays of urease activity.**

- A. Qualitative assays of urease activity in YLB medium with or without *Yersinia pseudotuberculosis* (*Yptb*) wild type (WT). pH was indicated by phenol red.
- B. Quantitative assays of urease activity in YLB medium with or without *Yersinia pseudotuberculosis* (*Yptb*) wild type (WT). The quantitative test buffers with [0.1 % (w/v) cetyltrimethylammonium bromide (CTAB), 0.6 % (w/v) NaCl, 100mM Citrate, 5 mM urea, pH = 6.0] or without CTAB [0.6 % (w/v) NaCl, 100mM Citrate, 5 mM urea, pH = 6.0] were used. The medium that without CTAB was served as negative control and the urease activity of this group was set as 0. Urease activity is expressed as micromoles of ammonia produced per minute per milligram of protein. Data shown are the averages and SDs (standard deviations) from at least three independent experiments. \*\*\* $p < 0.001$ , \* $p < 0.05$ , NS, not significant.

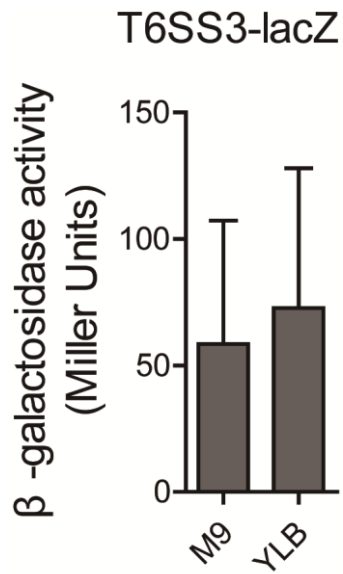

**Figure S2. Different culture medium does not affect T6SS3 promoter related  $\beta$ -galactosidase activity.**

$\beta$ -galactosidase assays of T6SS3 promoter activity of the *Yptb* wild type (WT) strains cultured in YLB and M9 medium. Data shown are the averages and SDs (standard deviations) from at least three independent experiments.

AACCUAUUCUUUAUCUUCUAUAUACCUUCUUCAUUGACGU  
 UGCAGCGGUCUCAGCGGCGCUCAUUCAUCCGAAUCACUGG  
 CGGGAGUCAGCGCAUCGUGAUGCGCUCGUUUGUCUGGCUG  
 UAACACGAGAGACCUUGGAUAUAGGCUGGGAAGAUCAUAG  
 GUUUAGUCAGUUGCUUUUUCUCACCUUUCACUUUCUUAACA  
UGAUACAGGAGGGGCUUAUGCAGCUCACCCCAAGAGA  
                     SD                    Met

**Figure S3. Identification of the CsrA binding sites.**

Nucleotide sequences of a portion of the *urease* mRNA 5'UTR. Three predicted CsrA binding sites are boxed. SD denotes the Shine-Dalgarno sequence of the mRNA encoding the urease. The sequences of synthetic RNA oligonucleotides used for analytical size exclusion chromatography (SEC) were indicated by shading (5'-CUUUCACUUUCUUAACAUGAUACAGGAGGGCUUAUG-3', 36bp).

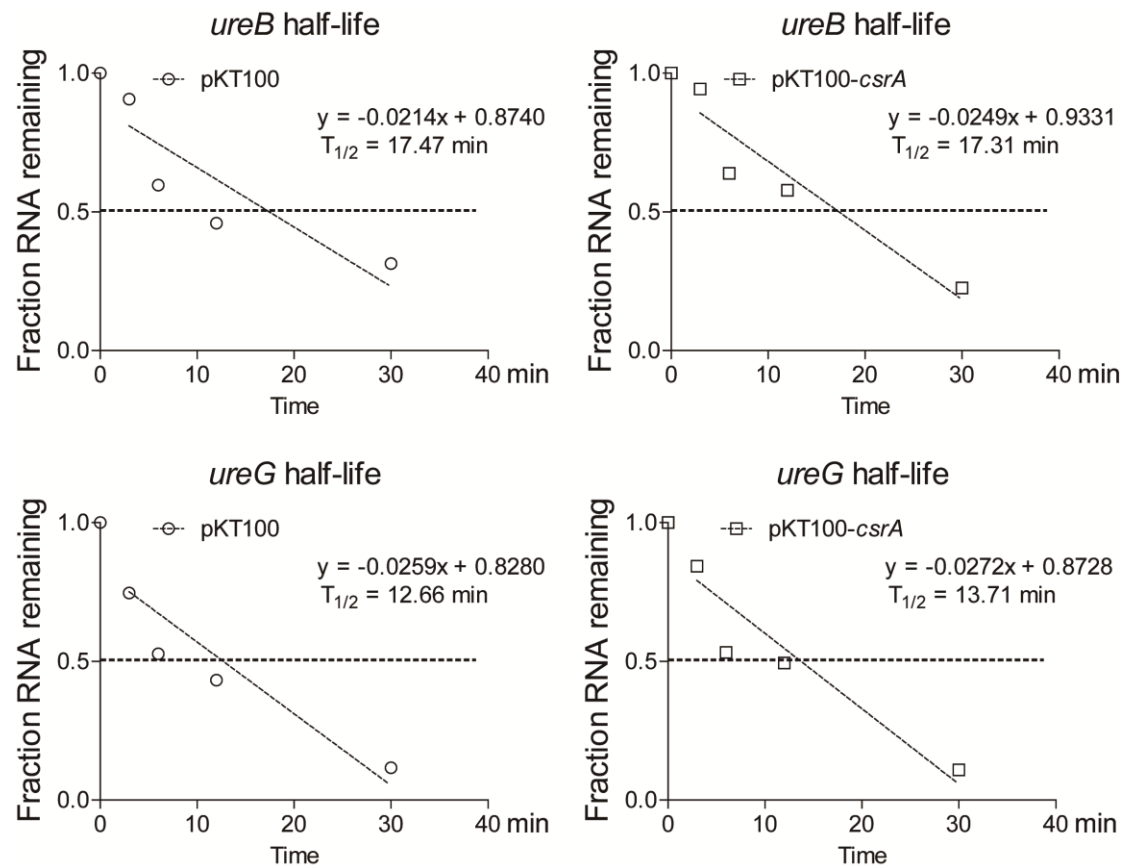

**Figure S4. RNA half-life assays of *ureB* and *ureG* gene.**

RNA half-life assays of *ureB* and *ureG* RNA extracted from *Yptb* wild type (pKT100) and *csrA* overexpression (pKT100-*csrA*) strain. Bacteria were cultured at 26 °C to the late exponential phase using a time gradient (0 min, 3 min, 6 min, 12 min and 30 min) and rifampicin was added to fix the RNA, then bacteria were harvested and RNA was extracted for qRT-PCR analysis. The level of *ureB* and *ureG* mRNA was normalized to the 16S rRNA level (Circles: pKT100; Squares: pKT100-*csrA*). The gene expression level at 0 min was set as 1. A Linear Regression was performed to determine the relation between Fraction RNA remaining (Y-axis) and time (X-axis). The sloped dash line in each panel represents the Linear Regression result (Red dashed line: pKT100; Black dashed line: pKT100-*csrA*). In the wild type (pKT100) strain, the time to have half of the initial RNA amount ( $T_{1/2}$ ) for *ureB* and *ureG* mRNA is 17.47 min ( $y = -0.0214x + 0.874$ ) and 12.66 min ( $y = -0.0259x + 0.828$ ), respectively. In the pKT100-*csrA* strain,  $T_{1/2}$  for *ureB* and *ureG* mRNA is 17.31 min ( $y = -0.0249x + 0.9311$ ) and 13.71 min ( $y = -0.0272x + 0.8728$ ), respectively ( $y$  represents the Fraction RNA remaining and  $x$  represents the Time). Data shown are the averages from four independent experiments.

Supplement1. The strains and plasmids used in this study

| Strain or plasmid                    | Relevant characteristics                                                                                | Reference                     |
|--------------------------------------|---------------------------------------------------------------------------------------------------------|-------------------------------|
| <b><i>E. coli</i></b>                |                                                                                                         |                               |
| S17-1 $\lambda$ <i>pir</i>           | $\lambda$ - <i>pir</i> lysogen of S17-1, <i>thi pro hsdR hsdM<sup>+</sup> recA</i> RP4 2-Tc::Mu-Km::Tn7 | Simon <i>et al.</i> , 1983    |
| <b><i>Y. pseudotuberculosis</i></b>  |                                                                                                         |                               |
| YPIII                                | Wild-Type <i>Y. pseudotuberculosis</i> , Nal <sup>r</sup>                                               | Rosqvist <i>et al.</i> , 1988 |
| $\Delta ompR$                        | <i>ompR</i> gene deleted in YPIII, Nal <sup>r</sup>                                                     | Zhang <i>et al.</i> , 2013    |
| $\Delta rovM$                        | <i>rovM</i> gene deleted in YPIII, Nal <sup>r</sup>                                                     | This study                    |
| $\Delta ureC$                        | <i>ureC</i> gene deleted in YPIII, Nal <sup>r</sup>                                                     | This study                    |
| $\Delta rovM \Delta ureC$            | <i>rovM</i> and <i>ureC</i> genes deleted in YPIII, Nal <sup>r</sup>                                    | This study                    |
| WT(pKT100)                           | YPIII containing pKT100, Nal <sup>r</sup> , Km <sup>r</sup>                                             | Zhang <i>et al.</i> , 2013    |
| $\Delta rovM$ (pKT100)               | $\Delta rovM$ containing pKT100, Nal <sup>r</sup> , Km <sup>r</sup>                                     | This study                    |
| $\Delta rovM$ (pKT100- <i>rovM</i> ) | $\Delta rovM$ containing pKT100- <i>rovM</i> , Nal <sup>r</sup> , Km <sup>r</sup>                       | This study                    |
| $\Delta rovM$ (pKT100- <i>CsrA</i> ) | $\Delta rovM$ containing pKT100- <i>CsrA</i> , Nal <sup>r</sup> , Km <sup>r</sup>                       | This study                    |
| WT(pKT100- <i>CsrA</i> )             | YPIII containing pKT100- <i>CsrA</i> , Nal <sup>r</sup> , Km <sup>r</sup>                               | Zhang <i>et al.</i> , 2013    |
| WT(pKT100- <i>CsrA</i> R44A)         | YPIII containing pKT100- <i>csrA</i> (R44A), Nal <sup>r</sup> , Km <sup>r</sup>                         | This study                    |
| <b>Plasmid</b>                       |                                                                                                         |                               |
| pKT100                               | Cloning vector, p15A replicon, Km <sup>r</sup>                                                          | Hu <i>et al.</i> , 2009       |
| pKT100- <i>rovM</i>                  | <i>rovM</i> under control of its own promoter in plasmid pKT100                                         | This study                    |
| pKT100- <i>csrA</i>                  | <i>csrA</i> under control of its own promoter in plasmid pKT100                                         | This study                    |
| pKT100- <i>csrA</i> (R44A)           | Argine in the site of 44 mutant into Alanine of <i>csrA</i> under control of its own                    | This study                    |

|                     |                                                                                            |                             |
|---------------------|--------------------------------------------------------------------------------------------|-----------------------------|
|                     | promoter in plasmid pKT100                                                                 |                             |
| pDM4                | Suicide vector, <i>mobRK2</i> , <i>oriR6K</i> , <i>pir</i> , <i>sacB</i> , Cm <sup>r</sup> | Milton <i>et al.</i> , 1996 |
| pDM4- $\Delta ureC$ | Construct used for in-frame deletion of <i>ureC</i> , Cm <sup>r</sup>                      | This study                  |

\*Nal<sup>r</sup>, Km<sup>r</sup>, Amp<sup>r</sup> and Cm<sup>r</sup> represent resistance to nalidixic, kanamycin, ampicillin and chloramphenicol, respectively.

#### Supplement2. The primes used in this study

| Primer             | Sequence                  | Note                                                    |
|--------------------|---------------------------|---------------------------------------------------------|
| Ypk_1133M1F Sal I  | ACGCGTCGACGAGATGGCAAATCC  | <i>ureC</i> upstream, to generate pDM4- $\Delta ureC$   |
| I                  | GTAG                      |                                                         |
| Ypk_1133M1R        | TAGACCCGCGTATTCTT         |                                                         |
| Ypk_1133M2F        | AAGAATACGCGGGTCTAGCCACCT  | <i>ureC</i> downstream, to generate pDM4- $\Delta ureC$ |
|                    | GTGAGCCAATT               |                                                         |
| Ypk_1133M2R Bgl I  | GGAAGATCTTTCATCCGGTGAACG  |                                                         |
|                    | ACT                       |                                                         |
| rovM-1F-Sal I      | CTCGGTCGACTGTGGGCTAGATCC  | <i>rovM</i> upstream, to generate pDM4- $\Delta rovM$   |
|                    | ATCC                      |                                                         |
| rovM-1R            | AGCAGCAGCAGCAGCAAA        |                                                         |
| rovM-2F            | TTTGCTGCTGCTGCTGCTGGGTTG  | <i>rovM</i> downstream, to generate pDM4- $\Delta rovM$ |
|                    | CCTGGTTTACCT              |                                                         |
| rovM-2R-Bgl II     | CTCGAGATCTCTGTGGGCTTTTAC  |                                                         |
|                    | TCC                       |                                                         |
| rovMF-BamH I       | CTGCGGATCCTTTATCCCTATTCAT | To generate pKT100- <i>rovM</i> also                    |
|                    | TCTCG                     |                                                         |
| rovMR-Sal I        | CTGCGTCGACTTAATCTTCATCACC | to generate pET28a- <i>rovM</i>                         |
|                    | TGTC                      |                                                         |
| csrA-F-BamH I      | GCGCGGATCCGGACAATGGTCGAT  | To generate pKT100- <i>csrA</i> also                    |
|                    | GAC                       |                                                         |
| csrA-R-Sal I       | GGGCGTCGACGTTACACGAGACG   | to generate pET28a- <i>csrA</i> ,                       |
|                    | CTGC                      |                                                         |
| ureABCp1000F-Sal I | ACGCGTCGACCTGCCTGTAATT    | To generate pDM4- <i>P<sub>ureABC</sub></i> ::          |
|                    | TATTGGCGTC                |                                                         |

|                   |                                          |                            |
|-------------------|------------------------------------------|----------------------------|
| ureABCpR-<br>XbaI | CTAGTCTAGAGGTGAGCTGCATAA<br>GCCCTC       | <i>lacZ</i>                |
| UreB-F            | CGAAAGACAGTAAAGAACAGAA                   | qRT-PCR Primer             |
| UreB-R            | GAAGAAATGGAAATGGGAC                      | for <i>ureB</i>            |
| UreE-F            | TGTATGTGCCTCTGACCG                       | qRT-PCR Primer             |
| UreE-R            | CACCACCAAACAGTAGCC                       | for <i>ureE</i>            |
| UreG-F            | AGGATGCCAAACAGGTAA                       | qRT-PCR Primer             |
| UreG-R            | AATCAGGTCGCTTTCAGG                       | for <i>ureG</i>            |
| RovM-F            | GGTAAAGCGCAGCCCATT                       | qRT-PCR Primer             |
| RovM-R            | AAAGGGACTGGCTCTCCG                       | for <i>rovM</i>            |
| 16S rRNA-F        | CTAGCGATTCCGACTTCAT                      | qRT-PCR Primer             |
| 16S rRNA-R        | CCCTTATCCTTTGTTGCC                       | for 16s rRNA               |
| ureABC-F          | GATTGGATGCTTTTTAATTTATTG                 | The probe for              |
| ureABC-R          | GCAAGCTAAAATCAAGACAAATTA                 | EMSA                       |
| ureC-NC-F         | CATCTCATCTCCCCGCAAC                      | The probe for              |
| ureC-NC-R         | ACCTTTCCCCAAAATACCAAC                    | EMSA, negative control     |
| Pure-CsrA RNA     | CUUUCACUUUCUUAACAUGAUAC<br>AGGAGGGCUUAUG | for SEC, RNA primer        |
| csrA-R44A M1R     | GATTTCTTCAGCGTGAAC                       | For                        |
| csrA-R44A M2F     | GTTCACGCTGAAGAAATC                       | <i>csrA</i>                |
| csrAexF BamH I    | CGCGGATCCATGCTTATTCTGACTC<br>GTCG        | For pET28a-<br>csrA (R44A) |
| csrAexR Sal I     | ACGCGTCGACTCAGTAAGTCGTCG<br>GTTGAG       |                            |

\*Underlined sites indicate restriction enzyme cutting sites added for cloning.



**References:**

- Simon, R., Priefer, U., and Pühler, A. (1983). A Broad Host Range Mobilization System for In Vivo Genetic Engineering: Transposon Mutagenesis in Gram Negative Bacteria. *Bio/Technology* 1, 784. doi: 10.1038/nbt1183-784.
- Rosqvist, R., Skurnik, M., and Wolf-Watz, H. (1988). Increased virulence of *Yersinia pseudotuberculosis* by two independent mutations. *Nature* 334, 522-524. doi: 10.1038/334522a0.
- Zhang, W., Wang, Y., Song, Y., Wang, T., Xu, S., Peng, Z., Lin, X., Zhang, L., and Shen, X. (2013). A type VI secretion system regulated by OmpR in *Yersinia pseudotuberculosis* functions to maintain intracellular pH homeostasis. *Environ Microbiol* 15, 557-569. doi: 10.1111/1462-2920.12005.
- Milton, D.L., O'toole, R., Horstedt, P., and Wolf-Watz, H. (1996). Flagellin A is essential for the virulence of *Vibrio anguillarum*. *J Bacteriol* 178, 1310-1319.
